# Supplementary material for: The Early Cretaceous Zaduo Granite, Eastern Qiangtang Terrane (China)—An Attempt to Constrain its Paleolatitude and Tectonic Implications
Source: Frontiers journal article supplement (doi:10.3389/feart.2022.829593), 2022-02-10
Supplement: Table_2.XLSX [file Table_2.XLSX]

## Sheet: Sheet1
Table S2. Results of isothermal remanent magnetization (IRM) component analysis for the representative samples and end-members.
	Component 1					Component 2					Component 3
Sample	Con	SIRM	log(B1/2)	B1/2	DP	Con	SIRM	log(B1/2)	B1/2	DP	Con	SIRM	log(B1/2)	B1/2	DP
	(%)	(μAm2)	(mT)	(mT)	(mT)	(%)	(μAm2)	(mT)	(mT)	(mT)	(%)	(μAm2)	(mT)	(mT)	(mT)
ZD 2-5	15.27	0.15	1.05	11.2	0.37	83.71	0.82	1.65	44.67	0.36	1.02	0.01	2.75	562.3	0.2
ZD 3-6	14.31	0.16	0.8	6.31	0.37	84.71	0.95	1.5	31.62	0.35	0.98	0.01	2.67	467.74	0.1
ZD 5-4	13.57	0.03	1.28	19.05	0.33	80.4	0.16	1.65	44.67	0.32	6.03	0.01	2.57	371.53	0.17
ZD 7-4	14.61	0.03	1.38	23.99	0.33	76.26	0.17	1.63	42.66	0.33	9.13	0.02	2.6	398.11	0.25
ZD 9-10	18.79	0.16	1.39	24.55	0.26	80.26	0.68	1.68	47.86	0.37	0.95	0.01	2.7	501.19	0.25
	Component C1					Component C2					Component C3
EM	Con	SIRM	log(B1/2)	B1/2	DP	Con	SIRM	log(B1/2)	B1/2	DP	Con	SIRM	log(B1/2)	B1/2	DP
	(%)	(μA/m)	(mT)	(mT)	(mT)	(%)	(μA/m)	(mT)	(mT)	(mT)	(%)	(μA/m)	(mT)	(mT)	(mT)
EM1	13.13	0.13	1.28	19.05	0.33	80.81	0.8	1.72	52.48	0.3	6.06	0.16	2.65	466.68	0.13
EM2	8.91	0.09	0.7	5.01	0.38	91.09	0.92	1.48	30.2	0.38	-	-	-	-	-
Note. Con- contribution; SIRM- saturation isothermal remanent magnetization; B1/2- the field at which half of the SIRM is reached; DP- dispersion parameter [Kruiver et al., 2001]; EM: end member.
