# Supplementary material for: The Early Cretaceous Zaduo Granite, Eastern Qiangtang Terrane (China)—An Attempt to Constrain its Paleolatitude and Tectonic Implications
Source: Frontiers journal article supplement (doi:10.3389/feart.2022.829593), 2022-02-10
Supplement: Table_3.XLSX [file Table_3.XLSX]

## Sheet: Sheet1
Table S3 Anhysteretic remanent magnetization (ARM) for individual specimens at room temperature
	1-1	1-5	1-6	1-7	1-8	2-1	2-4	2-5	3-1	3-2	3-6	4-2	4-5	4-6	4-7	4-8	4-10	5-1	5-2	5-3	5-4	5-6	5-8	5-10	6-2	6-3	6-5	7-1	7-3	7-4	8-11	9-1	9-10
0	0	0	0	0	0	0	0	0	0	0	0	0	0	0	0	0	0	0	0	0	0	0	0	0	0	0	0	0	0	0	0	0	0
2.5	1.30654	0.560412	2.27483	4.19073	2.30509	3.41682	0.640898	0.272474	1.0768	1.74871	0.956823	1.94382	4.36151	2.4211	3.971	2.3111	0.928381	0.197029	0.14235	0.114788	0.139189	0.113965	0.114009	0.126614	0.388252	0.468531	1.10801	0.0850437	0.166532	0.137879	0.76079	0.369978	1.00615
5	3.0982	1.52822	4.21239	8.22846	4.53659	6.34023	1.64932	0.880966	2.43185	3.61871	2.16092	4.03906	7.85017	4.55199	6.92909	4.41581	2.25832	0.632879	0.475854	0.443723	0.466392	0.411641	0.400771	0.513453	0.983534	1.27505	2.75178	0.317207	0.465221	0.432403	1.89411	0.812266	2.13784
7.5	4.68475	2.22525	5.37433	11.4836	6.14779	8.37694	2.7373	1.58439	3.77009	5.21652	3.25079	5.98772	10.2061	6.19008	8.85522	5.85509	3.64592	1.17062	0.892131	0.857336	0.894413	0.787357	0.751769	0.979706	1.65873	2.08323	3.96607	0.61122	0.790545	0.768701	3.06787	1.49399	3.40832
10	6.35954	3.27159	6.3832	13.629	7.72014	9.85508	3.64904	2.03741	4.63629	6.85233	4.26526	7.3028	12.322	7.78757	10.4561	7.03212	5.07471	1.75102	1.35179	1.33595	1.37196	1.20105	1.17663	1.51266	2.23111	2.86367	5.40182	0.908978	1.26152	1.16737	4.43461	2.37784	4.79723
15	8.99199	4.94033	9.45521	15.9468	10.0451	11.1359	5.61175	2.9951	6.16295	8.56656	5.84018	9.02603	14.5072	9.91752	11.7732	9.33185	6.98883	3.01092	2.28786	2.28731	2.42583	2.10334	2.03492	2.63711	3.30344	4.43864	7.2827	1.61616	2.06154	1.96188	6.74143	3.65907	6.61118
20	11.0615	6.36678	12.0438	18.7442	12.2416	13.0234	7.49262	4.06104	7.70611	10.0328	7.51081	11.4435	16.3811	10.818	13.6439	10.9893	9.17023	4.23888	3.30788	3.28811	3.54434	3.06987	2.93348	3.7635	4.21296	6.01474	9.30345	2.33733	2.97736	2.79602	8.97087	5.29265	8.97027
25	13.5244	7.93153	13.5834	21.5399	14.0216	14.2445	9.03078	5.07236	9.16902	11.4907	9.19369	13.0021	18.6193	12.2116	15.0771	12.3594	11.4351	5.41638	4.25123	4.24775	4.63499	4.00053	3.77541	4.83581	5.3457	7.59926	11.1269	3.0725	4.01208	3.57857	10.8328	6.8615	10.6728
30	14.8944	9.54137	15.1021	22.4928	15.9427	14.5652	10.356	5.74469	10.1658	12.335	10.5425	14.6279	20.004	13.2711	15.8075	13.3567	12.8806	6.37943	5.07481	5.02666	5.57568	4.87047	4.51535	5.71412	6.14292	8.85202	12.4579	3.72211	4.81953	4.3168	12.2804	8.065	12.3388
35	15.9012	10.6399	16.9858	23.5536	16.5641	16.1221	11.2205	6.50804	11.0347	13.7311	11.5823	15.9096	22.8686	13.8695	17.101	14.8035	14.6613	7.24917	5.8593	5.77012	6.45058	5.65927	5.18613	6.54848	7.04944	9.90854	13.2793	4.2556	5.632	5.06231	13.4014	9.35335	13.9711
40	17.3606	11.2312	17.8029	26.0455	17.4425	16.474	12.5222	7.24778	11.9751	14.1271	12.7884	16.4311	24.637	15.3154	18.8549	15.7296	15.1695	7.94151	6.54137	6.37681	7.25516	6.33854	5.76234	7.23904	7.97701	10.7369	14.4493	4.73608	6.21549	5.63297	14.8606	10.2618	15.1746
45	18.8087	12.4055	18.2362	26.0563	18.4185	16.7823	13.5669	7.53486	12.8924	14.9312	13.2323	17.5011	25.2602	15.7082	18.8631	16.4301	16.292	8.55385	7.05791	6.91845	7.8565	6.86822	6.22346	7.81077	8.31615	11.3942	15.5228	5.11433	6.82209	6.06538	15.7656	10.9006	15.5423
50	19.2748	12.9817	21.1064	28.0933	19.555	16.9068	14.0828	8.30191	13.3266	15.0605	14.399	17.9487	26.3727	16.2289	19.4226	16.8665	18.3506	8.98821	7.53537	7.2917	8.3714	7.31834	6.63317	8.24701	8.78464	11.8854	16.1853	5.46225	7.24958	6.47096	16.1576	11.3558	17.2373
60	20.672	13.7545	22.1709	29.8966	19.9193	16.9184	14.755	8.8072	14.2381	16.163	15.1219	18.7841	27.6996	16.6484	20.7826	17.6867	18.4761	9.63952	8.07429	7.82037	9.04374	7.92713	7.12015	8.84078	9.5286	12.7035	17.1768	5.84073	8.00112	6.8782	16.5514	12.1987	17.6668
70	21.37	14.3226	22.3245	30.4378	20.9137	16.9443	14.8138	9.25222	14.6381	16.4942	15.2638	19.7584	28.0498	16.7568	20.9171	18.5342	18.6254	9.93159	8.38359	8.0867	9.41124	8.25196	7.42242	9.13323	9.75272	13.1329	17.4809	6.02197	8.0654	7.10975	16.6469	12.5489	18.4834
85	21.8203	14.7807	22.5569	32.0469	20.9425	17.1919	14.8961	9.4259	14.7006	18.5944	16.0605	19.9421	28.2405	16.7656	20.9463	18.6774	18.6419	10.0906	8.62552	8.25462	9.73731	8.45387	7.52174	9.31821	9.76134	13.4854	18.2565	6.18453	8.47816	7.23322	17.1188	12.6229	19.6985
100	22.0839	14.8371	23.2728	32.3363	21.3425	17.2783	14.9527	9.42593	14.8069	18.6291	16.1475	20.4811	28.5342	16.7859	20.9489	18.8523	20.1215	10.1007	8.62929	8.26556	9.76764	8.50732	7.58173	9.37687	9.9848	13.5684	18.3168	6.19887	8.52001	7.24075	17.5432	13.2439	19.9423
120	22.7932	15.3232	24.2582	32.3799	21.3615	17.5945	15.1282	9.49847	14.9075	18.6481	16.1752	20.4825	28.8687	17.0406	21.0162	19.0171	20.1983	10.1362	8.65002	8.2658	9.76826	8.54899	7.60991	9.38732	9.98603	13.6044	18.4389	6.20464	8.53561	7.25068	17.67	13.2558	20.0726
150	22.9142	15.4053	24.6577	32.4091	21.6817	17.7228	15.3963	9.50413	15.1678	18.6802	16.2099	20.5058	29.4363	17.1025	21.0391	19.0393	20.4134	10.1538	8.65351	8.2662	9.77597	8.56944	7.64723	9.41701	10.2376	13.642	18.4896	6.25818	8.54261	7.26454	18.1461	13.2971	20.1632
