# Supplementary material for: The Early Cretaceous Zaduo Granite, Eastern Qiangtang Terrane (China)—An Attempt to Constrain its Paleolatitude and Tectonic Implications
Source: Frontiers journal article supplement (doi:10.3389/feart.2022.829593), 2022-02-10
Supplement: Table_4.XLSX [file Table_4.XLSX]

## Sheet: Sheet1
Table S4. Characteristic remanent magnetization (ChRM) direction of each specimen.
Samplle ID	Method	n	Dg (°)	Ig (°)	Ds1 (°)	Is1 (°)	Ds2 (°)	Is2 (°)	MAD (°)
ZD1-1	AFD	15	351	44.6	26.9	68.7	4	32.6	3.5
ZD1-2	AFD	14	3.4	38.7	34	58.2	11.9	24	2.8
ZD1-3	AFD	16	14.4	50.9	62.2	60.6	12.2	36.3	3.5
ZD1-4	AFD	4	347.5	23.7	0.3	51.8	353.5	13.8	7.4
ZD1-5	AFD	8	160.4	-21.5	169	-51.6	166.3	-13.8	8.8
ZD1-6	AFD	17	1.4	49.9	49.9	66.9	14.1	35.2	3.2
ZD1-7	AFD	16	6.2	34.9	32.9	53.8	13.1	19.9	6.3
ZD1-8	AFD	14	5.5	37.7	35.2	56.3	13.3	22.6	7
ZD1-9	AFD	13	9.6	42.1	44.9	57.6	17.9	26.1	5.5
ZD1-10	AFD	10	349.3	29.9	6.7	56.9	357.1	19.1	7
ZD2-1	AFD	1	3.3	36.2	31	56.3	11	21.7	5.3
ZD2-2	AFD	13	5	39.8	37.1	58.2	13.5	24.7	5.7
ZD2-3	AFD	9	1.8	35.4	28.3	56.3	9.5	21.2	14.4
ZD2-4	TD	12	358.7	41.5	32.2	62.6	8.9	27.8	5.3
ZD2-4	AFD	14	1.8	44.8	40.8	63.5	12.6	30.2	3.5
ZD2-5	AFD	16	4.9	47.3	48.1	63.5	15.8	32	3.6
ZD2-6	AFD	6	12.8	36.9	41.9	52	19.2	20.4	9.2
ZD2-7	AFD	6	354.7	28.5	13.1	53.6	7.5	22.4	9.8
ZD2-8	AFD	16	357	32.6	19.6	56.2	4.6	19.7	3.1
ZD2-9	AFD	10	8.2	54.6	65.2	65.7	20.9	38.4	6
ZD2-10	AFD	12	358.4	31.1	20	54.3	5.3	17.9	6.5
ZD3-1	AFD	14	5	42.6	40.9	60.3	14.4	27.5	5.1
ZD3-2	AFD	13	356.6	20.5	10.2	45.7	0.6	8.3	5.5
ZD3-3	AFD	16	22.5	44.8	59.6	52.5	28.7	26.7	5.1
ZD3-4	AFD	12	5.8	15.9	18.2	37.7	8	1.4	7.8
ZD3-5	AFD	10	3.4	35.1	29.9	55.3	10.8	20.8	6.1
ZD3-6	AFD	6	5.2	48.4	50.3	64	16.4	33	6.9
ZD3-7	AFD	7	358	54.4	57.8	70.9	13.2	40.1	6
ZD3-8	AFD	11	3.3	46.2	44.7	63.6	14.2	31.2	2.6
ZD3-9	AFD	10	5.9	38	35.9	56.4	13.7	22.8	3.5
ZD3-10	AFD	11	6.3	36.8	35.1	55.2	13.7	21.6	6.7
ZD4-1	AFD	12	4.1	36.3	32	56	11.7	21.6	6.4
ZD4-2	AFD	12	7.5	23.6	24.9	43.8	11.1	8.6	4.1
ZD4-3	AFD	10	10.8	30	33.3	47.6	15.8	14.1	6
ZD4-4	AFD	15	358.8	37.8	27.5	59.7	7.8	24.3	7.7
ZD4-5	AFD	6	7.4	33.1	32.5	51.8	13.6	17.8	9.9
ZD4-6	AFD	10	357.6	55.4	60.3	71.6	13.7	41.1	8.5
ZD4-7	AFD	14	13.8	25.5	32.9	42.4	17.5	9.2	9.7
ZD4-8	AFD	12	1.7	38.4	31.7	58.8	10.3	24.2	3.2
ZD4-9	AFD	14	6.7	33.2	31.8	52.2	13.1	18.1	7.8
ZD4-10	AFD	11	1	33.4	25.3	55.1	8.2	19.5	3.9
ZD5-1	AFD	19	4.4	33.1	29.2	53.2	11.1	18.4	2.2
ZD5-2	AFD	15	0.1	36	27	57.7	8.3	22.2	1.7
ZD5-3	AFD	18	30.6	44.5	65.4	48.1	35	25.5	3.4
ZD5-4	AFD	17	358.5	35.4	24.4	57.9	6.9	22.2	1.1
ZD5-5	TD	13	359.3	40.6	31.6	61.6	9.2	26.7	1.8
ZD5-5	AFD	16	358.1	37.6	26.3	59.9	7.1	24.2	1.7
ZD5-6	AFD	18	21.9	55.7	75.2	59.2	30.9	37.5	2.7
ZD5-7	AFD	14	3.4	37.6	45	64.4	11.5	22.9	4.8
ZD5-8	AFD	13	10.3	39.8	42.8	55.5	17.8	23.7	5.4
ZD5-9	AFD	13	4.1	36.4	32.2	56.1	11.8	21.7	12.3
ZD5-9a	AFD	14	2.4	25.6	20.5	47.8	7.3	11.7	2.1
ZD5-10	AFD	13	3.8	33.3	28.6	53.7	10.6	18.7	10.8
ZD5-11	AFD	10	3.2	39.8	35.2	59.2	12.1	25.2	6.8
ZD6-1	AFD	9	38.7	24.5	55.1	28.6	39.8	5	9.7
ZD6-2	AFD	14	350.5	40	18.9	65.3	1.8	28.3	2.4
ZD6-3	AFD	9	7.2	30.9	30.2	50.1	12.9	15.7	6
ZD6-4	AFD	8	357.9	51.5	50.2	69.7	12.2	37.4	3.5
ZD6-5	AFD	6	5.8	36.7	34.4	55.5	13.3	21.7	5.2
ZD6-6	AFD	14	1.4	39.6	32.8	59.9	10.5	25.3	6
ZD6-7	AFD	9	351.3	52.2	45.4	73.5	7.7	39.6	3
ZD6-8	AFD	7	14.8	14.1	26.6	32.1	16	-2.2	4.1
ZD6-9	AFD	15	348.7	33.6	9	60.5	357.9	22.8	3.8
ZD7-1	AFD	9	10.9	29.8	33.2	47.3	15.8	13.9	7.4
ZD7-3	AFD	19	2.3	39.1	33.2	59	11.1	24.6	1.2
ZD7-5	TD	16	327.5	48.6	338	80.4	347.4	42.8	4.5
ZD7-5	AFD	8	5.9	37.6	35.5	56.1	13.6	22.5	2.6
ZD7-6	AFD	9	5.2	39.7	37.2	58	13.6	24.6	2.3
ZD7-7	AFD	9	20.9	41.3	54.2	51	26.8	23.5	5.7
ZD7-8	AFD	9	18.1	36.2	46.3	48.7	23.4	18.9	7.8
ZD7-9	AFD	11	14.6	28.3	35.9	44.2	18.7	11.7	4.5
ZD7-10	AFD	14	2.9	39.1	34	58.7	11.6	24.5	3.7
ZD7-11	AFD	7	0.6	40.8	33.4	61.2	10.2	26.7	1.5
ZD8-1	AFD	10	346.1	39.8	11.5	66.9	358	29.3	4.1
ZD8-2	AFD	9	350.1	37.9	15.6	63.7	0.6	26.5	2.6
ZD8-3	AFD	9	358	41	30.5	62.6	7.7	26.5	4.3
ZD8-4	AFD	19	1.3	35.1	27.4	56.3	9	21	2.6
ZD8-5	AFD	5	332.8	54.9	25.5	84.3	355.8	46.8	10.3
ZD8-6	AFD	7	1.6	41.5	35.5	61.2	11.2	27.1	1.1
ZD8-7	AFD	12	4.7	30.5	27.1	50.9	10.7	15.8	3.7
ZD8-8	AFD	8	2.6	34.8	28.8	55.5	10	20.5	1.8
ZD8-9	TD	13	37.8	30.1	57.5	32.8	39.3	9.6	7.3
ZD9-1	AFD	8	35.7	49.1	74	48.6	39.5	29.6	5.6
ZD8-10	AFD	8	6.3	33.7	31.8	52.8	12.8	18.6	2.3
ZD8-11	AFD	6	5.7	36.8	34.5	55.6	13.3	21.8	1.2
ZD9-1	AFD	8	359.4	35.5	25.6	57.5	7.6	21.8	1.9
ZD9-2	AFD	8	359.7	37.4	28.2	59	8.5	23.7	2.1
ZD9-3	AFD	8	5.3	39.2	36.7	57.6	13.5	24.1	2.7
ZD9-3a	AFD	9	354.6	49.1	40.8	70	8.6	35.9	3.5
ZD9-4	AFD	5	6.7	47.2	49.8	62.5	17.2	31.6	1.1
ZD9-5	AFD	9	0.5	52.9	55.8	68.9	14.7	38.2	6.8
ZD9-6	AFD	9	10.2	41.7	45	56.9	18.2	25.6	4.6
ZD9-7	AFD	13	6.5	57.2	70.2	67.6	20.7	41.1	3.3
ZD9-8	AFD	8	3.4	29.7	25	50.9	9.3	15.4	2.2
ZD9-9	AFD	6	335	53.2	21.1	82.2	356.2	44.7	3.8
ZD9-10	TD	9	28.3	28.6	49	37.4	30.9	10	3.5
ZD9-10	AFD	8	11	46.8	52.9	60	20.3	30.4	2.3
Notes: Sample ID, specimen identification; Method, alternating field demagnetization (AFD), thermal demagnetization (TD); n, number of demagnetization steps used to define the ChRM direction; Dg, Ig, declination and inclination before tilt correction; Ds1, Is1 (Ds2, Is2), declination and inclination after tilt correction by strike /dip of 54°/32° and 321°/20°, respectively; MAD, maximum angular d…
