# Supplementary material for: The Early Cretaceous Zaduo Granite, Eastern Qiangtang Terrane (China)—An Attempt to Constrain its Paleolatitude and Tectonic Implications
Source: Frontiers journal article supplement (doi:10.3389/feart.2022.829593), 2022-02-10
Supplement: Table_5.XLSX [file Table_5.XLSX]

## Sheet: Sheet1
Table 1. Paleomagnetic poles for the Eastern Qiangtang Terrane during the Cretaceous
Sampling site			Lithology	n/N	In situ		Tilt-corrected		k	α95	Pole location
Site	Slat (°N)	Slon (°E)			Dec(°)	Inc(°)	Dec(°)	Inc(°)			Plat (°N)	Plon (°E)	A95 (°)
Lower Cretaceous strata of Huang et al., 1992
A	29.7	98.4	Red beds	4/5	268.6	46.6	70.2	52.7	104.5	9	31.2	165.3	10.3
B	29.7	98.4	Red beds	4/5	279.2	42.1	78.6	53	73.1	9	24.7	162.4	10.4
D	29.7	98.4	Red beds	5/5	259.7	5.6	40.9	51.7	46.2	11.4	55	173.3	12.8
E	29.7	98.4	Red beds	5/5	265.4	5.8	38.1	45.3	198.9	5.4	56.5	183.9	5.5
G	29.7	98.4	Red beds	5/5	280.6	16.5	14.4	29.3	32.2	13.7	70.7	231.9	11.2
I	29.7	98.4	Red beds	5/5	276.1	23.7	46	31.6	95.1	7.9	46.2	194.5	6.6
J	29.7	98.4	Red beds	5/5	248.2	47.2	94.1	48.3	41	12.1	10.9	160.7	12.8
K	29.7	98.4	Red beds	5/5	250.9	55	86.8	39.5	29.1	14.1	13.5	170.3	13.4
A1	29.7	98.6	Red beds	3/5	64.3	-51.6	75.9	41.7	2272.3	2.6	23.3	173.3	2.5
B1	29.7	98.6	Red beds	4/5	76.2	-50.1	72.7	53.8	138.3	7.8	29.5	163.6	9.1
C1	29.7	98.6	Red beds	5/5	70.6	-33.9	47.4	61.7	152.7	6.2	50.2	156.1	8.4
D1	29.7	98.6	Red beds	5/5	67.9	-29.4	29.4	60.6	839.6	3.3	63.5	153.9	4.4
Upper Cretaceous strata of Tong et al., 2015
MK2	29.7	98.6	Red beds	12/12	61.5	58.7	119.7	70	75.5	5	8.5	129.5	8
MK3	29.7	98.6	Red beds	13/14	226.5	18.5	224.8	-51.4	25.2	8.4	51.8	173.1	9.4
MK4	29.7	98.6	Red beds	12/12	221.4	15.6	218.2	-51.4	33.8	8	57.3	174.4	9
MK5	29.7	98.6	Red beds	11/13	216	29.9	214.6	-38.9	43.6	7.4	58	194.2	6.8
MK6	29.7	98.6	Red beds	12/12	75.9	5.5	71.1	59.2	119.9	3.8	32.3	157.5	4.9
MK7	29.7	98.6	Red beds	11/12	87.9	6.6	84.9	56.1	151.1	3.9	21	157.3	4.8
MK8	29.7	98.6	Red beds	8/11	107.4	49.9	56.2	55.5	132.7	5.8	43	165.3	7
MK9	29.7	98.6	Red beds	11/12	104.2	52.3	34.7	57.9	67.9	5.6	60.1	161.9	7.1
MK10	29.7	98.6	Red beds	11/12	62.5	4.6	47.6	62	66.2	6	50	155.4	8.2
MK11	29.7	98.6	Red beds	12/14	63.4	19.2	41.8	62.2	27	11.8	54.2	154.3	16.2
MK12	29.7	98.6	Red beds	13/14	62	23.4	33.2	56.9	116.5	4.8	61.4	163.9	5.9
MK13	29.7	98.6	Red beds	11/12	64.3	23.4	45.1	40.3	79.1	5.2	49.3	187.1	4.9
MK14	29.7	98.6	Red beds	9/13	1.8	39.1	40.5	44.5	111.9	4.9	54.2	184.2	4.9
MK15	29.7	98.6	Red beds	9/12	350.3	41.2	42.4	59.8	43	8.5	37.3	178.3	8.3
MK16	29.7	98.6	Red beds	10/12	348.9	37.6	46.5	69.6	49	10.1	49	139.8	16
MK17	29.7	98.6	Red beds	11/12	25.5	29.7	62.4	39.5	18.3	16.1	34.1	180.3	14.9
MK18	29.7	98.6	Red beds	10/12	10.1	39.6	70.6	53.7	104.5	5.9	31.2	164.2	6.9
Upper Cretaceous strata of Huang et al., 1992
B	29.7	98.7	Red beds	5/5	45.7	-9.3	34.8	36.2	232.7	5	57.2	197.5	4.4
C	29.7	98.7	Red beds	5/5	21.5	2.6	3.9	57.5	93.6	8	91	118.8	10
D	29.7	98.7	Red beds	5/5	298.9	44.2	32.3	57.2	359.2	3.9	62.1	163.1	4.9
E	29.7	98.7	Red beds	5/5	9.8	38.7	49	39.3	433.6	3.7	45.7	186.3	3.4
F	29.7	98.7	Red beds	5/5	337.4	45.2	47.8	63.3	52.4	10.7	49.7	153	15
G	29.7	98.7	Red beds	5/5	5.5	28.7	43.4	55.1	66.3	9.5	53.3	167.7	11.4
H	29.7	98.7	Red beds	5/5	10.8	36.8	56.6	43.3	91.3	8.1	40.1	179.4	7.9
I	29.7	98.7	Red beds	5/5	151.2	-60.5	242.3	-51	1233.6	3.2	37.2	169.5	3.6
J	29.7	98.7	Red beds	5/5	325.2	49.7	44.1	45.8	513.4	3.4	51.4	181.1	3.5
K	29.7	98.7	Red beds	9/10	323.2	52.1	47.6	46.7	178.3	3.9	48.5	178.8	4
M	29.7	98.7	Red beds	5/5	44.6	32.1	357.6	55.9	102.3	7.6	50	165.9	9.2
Mean paleomagnetic pole during K1: Plat. = 40.6°N, Plon. = 170.5°E, n=12, K = 12.2, A95 = 13.0° (Huang et al., 1992)
Mean paleomagnetic pole during K2: Plat. = 48.9°N, Plon. = 168.1°E, n=28, K = 19.9, A95 = 6.3° (Huang et al., 1992 + Tong et al., 2015)
Mean paleomagnetic pole during K: Plat. = 46.5°N, Plon. = 168.9°E, n=40, K = 16.6, A95 = 5.7° (Huang et al., 1992 + Tong et al., 2015)
N and n are number of samples collected and used for paleomagnetic calculation, respectively. Dec. and Inc. are declination and inclination, respectively; k is the Fisherian precision parameter for samples (Fisher, 1953); a95 and A95 are the radius of cone at 95% confidence level about the mean direction. Lat. and Lon. are latitude and longitude of paleomagnetic poles.
